# Supplementary material
Source: publisher figshare collection journal article supplement (https://geolsoc.figshare.com/articles/dataset/_/3453767)
Supplement: Supplementary file 1 [file 1]

**Supplementary material 3. Hf isotopes values**

| Location | Sample | Rock type  | Grain # | t (Ma) | $^{176}\text{Yb}/^{177}\text{Hf}$ | $^{176}\text{Lu}/^{177}\text{Hf}$ | $^{176}\text{Hf}/^{177}\text{Hf}$ | $\epsilon_{\text{Hf}}(t)$ | 2 $\sigma$ | $f_{\text{Lu/Hf}}$ |
|----------|--------|------------|---------|--------|-----------------------------------|-----------------------------------|-----------------------------------|---------------------------|------------|--------------------|
| Adamello | MAT2   | Hornblende | Zrn1    | 40.1   | 0.007755                          | 0.000458                          | 0.283010                          | 7.9                       | 0.9        | -0.99              |
| Adamello | MAT2   | Hornblende | Zrn1    | 40.5   | 0.093328                          | 0.003920                          | 0.283071                          | 10.0                      | 1.3        | -0.88              |
| Adamello | MAT2   | Hornblende | Zrn2    | 39.9   | 0.042286                          | 0.002245                          | 0.283178                          | 13.8                      | 1.1        | -0.93              |
| Adamello | MAT2   | Hornblende | Zrn3    | 40.7   | 0.137935                          | 0.006514                          | 0.283022                          | 8.2                       | 1.3        | -0.80              |
| Adamello | MAT2   | Hornblende | Zrn3    | 41.3   | 0.014229                          | 0.000746                          | 0.283029                          | 8.6                       | 1.2        | -0.98              |
| Adamello | MAT2   | Hornblende | Zrn4    | 40.2   | 0.129855                          | 0.006707                          | 0.283019                          | 8.1                       | 1.4        | -0.80              |
| Adamello | MAT2   | Hornblende | Zrn4    | 40.8   | 0.016076                          | 0.000947                          | 0.283001                          | 7.6                       | 1.1        | -0.97              |
| Adamello | MAT2   | Hornblende | Zrn5    | 41.6   | 0.152878                          | 0.007419                          | 0.283144                          | 12.5                      | 1.5        | -0.78              |
| Adamello | MAT2   | Hornblende | Zrn6    | 40.7   | 0.195504                          | 0.008968                          | 0.283024                          | 8.2                       | 1.8        | -0.73              |
| Adamello | MAT2   | Hornblende | Zrn7    | 40.0   | 0.014957                          | 0.000812                          | 0.283094                          | 10.9                      | 0.8        | -0.98              |
| Adamello | MAT2   | Hornblende | Zrn8    | 44.2   | 0.012324                          | 0.000689                          | 0.283048                          | 9.3                       | 0.7        | -0.98              |
| Adamello | MAT2   | Hornblende | Zrn8    | 40.6   | 0.108055                          | 0.005481                          | 0.283132                          | 12.1                      | 1.0        | -0.83              |
| Adamello | MAT2   | Hornblende | Zrn9    | 41.4   | 0.034671                          | 0.001628                          | 0.283092                          | 10.8                      | 1.0        | -0.95              |
| Adamello | MAT2   | Hornblende | Zrn9    | 41.4   | 0.020711                          | 0.001163                          | 0.283017                          | 8.2                       | 1.1        | -0.96              |
| Adamello | MAT2   | Hornblende | Zrn10   | 41.7   | 0.119224                          | 0.005239                          | 0.283153                          | 12.9                      | 1.2        | -0.84              |
| Adamello | MAT2   | Hornblende | Zrn10   | 41.7   | 0.030384                          | 0.001495                          | 0.283022                          | 8.3                       | 1.4        | -0.95              |
| Adamello | MAT2   | Hornblende | Zrn12   | 41.6   | 0.024841                          | 0.001359                          | 0.283143                          | 12.6                      | 1.1        | -0.96              |
| Adamello | MAT2   | Hornblende | Zrn14   | 44.1   | 0.023129                          | 0.001286                          | 0.283040                          | 9.0                       | 0.7        | -0.96              |
| Adamello | MAT2   | Hornblende | Zrn14   | 43.3   | 0.132783                          | 0.005785                          | 0.283198                          | 14.4                      | 1.1        | -0.83              |
| Adamello | MAT2   | Hornblende | Zrn15   | 42.7   | 0.106892                          | 0.004582                          | 0.283027                          | 8.4                       | 1.4        | -0.86              |
| Adamello | MAT2   | Hornblende | Zrn15   | 52.6   | 0.009740                          | 0.000572                          | 0.283077                          | 10.3                      | 1.2        | -0.98              |
| Adamello | MAT2   | Hornblende | Zrn16   | 41.6   | 0.026340                          | 0.001387                          | 0.283041                          | 9.0                       | 0.7        | -0.96              |
| Adamello | MAT2   | Hornblende | Zrn18   | 40.1   | 0.065954                          | 0.003528                          | 0.282946                          | 5.6                       | 0.9        | -0.89              |
| Adamello | MAT2   | Hornblende | Zrn18   | 39.4   | 0.010749                          | 0.000600                          | 0.283006                          | 7.8                       | 0.8        | -0.98              |
| Adamello | MAT2   | Hornblende | Zrn34   | 42.2   | 0.097927                          | 0.005341                          | 0.283135                          | 12.2                      | 1.1        | -0.84              |
| Adamello | MAT2   | Hornblende | Zrn34   | 41.7   | 0.031953                          | 0.001644                          | 0.283036                          | 8.8                       | 0.8        | -0.95              |
| Adamello | MAT2   | Hornblende | Zrn37   | 44.6   | 0.103324                          | 0.004407                          | 0.283067                          | 9.8                       | 0.9        | -0.87              |
| Adamello | MAT2   | Hornblende | Zrn38   | 41.4   | 0.017128                          | 0.000900                          | 0.283039                          | 9.0                       | 0.9        | -0.97              |
| Adamello | MAT2   | Hornblende | Zrn38   | 44.1   | 0.020446                          | 0.001206                          | 0.283050                          | 9.3                       | 0.8        | -0.96              |
| Adamello | MAT2   | Hornblende | Zrn40   | 41.8   | 0.092965                          | 0.004938                          | 0.283060                          | 9.6                       | 1.0        | -0.85              |
| Adamello | MAT2   | Hornblende | Zrn43   | 48.5   | 0.021738                          | 0.001178                          | 0.283045                          | 9.1                       | 0.9        | -0.96              |
| Adamello | MAT2   | Hornblende | Zrn43   | 42.7   | 0.043437                          | 0.002535                          | 0.283076                          | 10.2                      | 1.1        | -0.92              |
| Adamello | MAT2   | Hornblende | Zrn46   | 41.2   | 0.026304                          | 0.001510                          | 0.283027                          | 8.5                       | 1.4        | -0.95              |
| Adamello | MAT2   | Hornblende | Zrn46   | 41.7   | 0.026393                          | 0.001501                          | 0.283042                          | 9.1                       | 1.5        | -0.95              |
| Adamello | MAT2   | Hornblende | Zrn46   | 42.9   | 0.039338                          | 0.001966                          | 0.283053                          | 9.4                       | 1.3        | -0.94              |
| Adamello | MAT2   | Hornblende | Zrn46   | 39.1   | 0.029951                          | 0.001549                          | 0.283053                          | 9.4                       | 1.2        | -0.95              |
| Adamello | MAT3   | Hornblende | Zrn1    | 37.0   | 0.043711                          | 0.002568                          | 0.283074                          | 10.2                      | 1.2        | -0.92              |
| Adamello | MAT3   | Hornblende | Zrn2    | 43.6   | 0.087006                          | 0.003951                          | 0.283055                          | 9.4                       | 1.0        | -0.88              |
| Adamello | MAT3   | Hornblende | Zrn2    | 40.7   | 0.016572                          | 0.000859                          | 0.283010                          | 7.9                       | 0.8        | -0.97              |
| Adamello | MAT3   | Hornblende | Zrn3    | 40.3   | 0.037996                          | 0.001754                          | 0.283072                          | 10.1                      | 1.2        | -0.95              |
| Adamello | MAT3   | Hornblende | Zrn3    | 44.7   | 0.012625                          | 0.000743                          | 0.283049                          | 9.3                       | 0.8        | -0.98              |
| Adamello | MAT3   | Hornblende | Zrn4    | 45.6   | 0.031272                          | 0.001652                          | 0.283074                          | 10.2                      | 1.8        | -0.95              |
| Adamello | MAT3   | Hornblende | Zrn4    | 45.6   | 0.034841                          | 0.001798                          | 0.283081                          | 10.4                      | 0.8        | -0.95              |
| Adamello | MAT3   | Hornblende | Zrn5    | 50.6   | 0.092752                          | 0.004944                          | 0.283023                          | 8.2                       | 1.0        | -0.85              |
| Adamello | MAT3   | Hornblende | Zrn5    | 34.6   | 0.112098                          | 0.005210                          | 0.283020                          | 8.2                       | 1.0        | -0.84              |
| Adamello | MAT3   | Hornblende | Zrn6    | 42.2   | 0.017293                          | 0.000967                          | 0.283020                          | 8.3                       | 0.8        | -0.97              |
| Adamello | MAT3   | Hornblende | Zrn7    | 49.3   | 0.106666                          | 0.004653                          | 0.283184                          | 13.9                      | 1.1        | -0.86              |
| Adamello | MAT3   | Hornblende | Zrn7    | 44.0   | 0.037711                          | 0.002005                          | 0.283005                          | 7.7                       | 0.7        | -0.94              |
| Adamello | MAT3   | Hornblende | Zrn8    | 48.7   | 0.013493                          | 0.000704                          | 0.283053                          | 9.4                       | 1.3        | -0.98              |
| Adamello | MAT3   | Hornblende | Zrn8    | 38.9   | 0.016794                          | 0.000865                          | 0.282985                          | 7.0                       | 0.8        | -0.97              |
| Adamello | MAT3   | Hornblende | Zrn9    | 37.4   | 0.105315                          | 0.005192                          | 0.283040                          | 8.9                       | 1.3        | -0.84              |
| Adamello | MAT3   | Hornblende | Zrn9    | 53.2   | 0.012103                          | 0.000600                          | 0.283080                          | 10.4                      | 1.0        | -0.98              |
| Adamello | MAT3   | Hornblende | Zrn10   | 44.5   | 0.057418                          | 0.002673                          | 0.283062                          | 9.7                       | 1.0        | -0.92              |
| Adamello | MAT3   | Hornblende | Zrn10   | 41.8   | 0.018512                          | 0.001119                          | 0.282975                          | 6.7                       | 1.7        | -0.97              |
| Adamello | MAT3   | Hornblende | Zrn11   | 40.4   | 0.079754                          | 0.003614                          | 0.283053                          | 9.4                       | 1.1        | -0.89              |
| Adamello | MAT3   | Hornblende | Zrn11   | 50.3   | 0.026438                          | 0.001505                          | 0.283058                          | 9.6                       | 0.9        | -0.95              |
| Adamello | MAT3   | Hornblende | Zrn12   | 51.6   | 0.092865                          | 0.004226                          | 0.283015                          | 8.0                       | 1.2        | -0.87              |
| Adamello | MAT3   | Hornblende | Zrn12   | 42.9   | 0.049716                          | 0.002354                          | 0.282976                          | 6.7                       | 1.0        | -0.93              |
| Adamello | MAT3   | Hornblende | Zrn13   | 42.8   | 0.036030                          | 0.001793                          | 0.283058                          | 9.6                       | 1.0        | -0.95              |
| Adamello | MAT3   | Hornblende | Zrn13   | 39.5   | 0.033161                          | 0.001715                          | 0.282979                          | 6.8                       | 1.0        | -0.95              |
| Adamello | MAT3   | Hornblende | Zrn16   | 39.6   | 0.085260                          | 0.004059                          | 0.283137                          | 12.3                      | 1.0        | -0.88              |
| Adamello | MAT3   | Hornblende | Zrn17   | 50.5   | 0.055100                          | 0.002648                          | 0.283065                          | 9.8                       | 1.0        | -0.92              |
| Adamello | MAT3   | Hornblende | Zrn17   | 51.9   | 0.054013                          | 0.002631                          | 0.283086                          | 10.6                      | 1.1        | -0.92              |
| Adamello | MAT3   | Hornblende | Zrn18   | 44.0   | 0.049488                          | 0.002349                          | 0.282996                          | 7.4                       | 1.0        | -0.93              |
| Adamello | MAT3   | Hornblende | Zrn18   | 39.3   | 0.036536                          | 0.001703                          | 0.283011                          | 8.0                       | 0.9        | -0.95              |

|          |      |              |       |      |          |          |          |      |     |       |
|----------|------|--------------|-------|------|----------|----------|----------|------|-----|-------|
| Adamello | MAT3 | Hornblendite | Zrn20 | 50.3 | 0.134355 | 0.006163 | 0.283008 | 7.7  | 1.1 | -0.81 |
| Adamello | MAT3 | Hornblendite | Zrn20 | 49.7 | 0.010441 | 0.000542 | 0.282980 | 6.9  | 1.1 | -0.98 |
| Adamello | MAT3 | Hornblendite | Zrn22 | 45.7 | 0.015926 | 0.000911 | 0.283009 | 7.9  | 0.7 | -0.97 |
| Adamello | MAT3 | Hornblendite | Zrn25 | 43.6 | 0.119702 | 0.005360 | 0.283007 | 7.7  | 1.1 | -0.84 |
| Adamello | MAT3 | Hornblendite | Zrn25 | 43.6 | 0.014666 | 0.000794 | 0.283044 | 9.1  | 0.7 | -0.98 |
| Adamello | MAT3 | Hornblendite | Zrn26 | 47.0 | 0.138856 | 0.006338 | 0.283050 | 9.2  | 1.2 | -0.81 |
| Adamello | MAT3 | Hornblendite | Zrn26 | 41.6 | 0.049949 | 0.002556 | 0.283071 | 10.1 | 1.1 | -0.92 |
| Adamello | MAT3 | Hornblendite | Zrn28 | 48.0 | 0.040678 | 0.002229 | 0.283041 | 9.0  | 0.9 | -0.93 |
| Adamello | MAT4 | Amph-gabbro  | Zrn5  | 44.6 | 0.100774 | 0.004639 | 0.282968 | 6.3  | 1.0 | -0.86 |
| Adamello | MAT4 | Amph-gabbro  | Zrn6  | 45.3 | 0.023848 | 0.001136 | 0.282946 | 5.6  | 1.2 | -0.97 |
| Adamello | MAT4 | Amph-gabbro  | Zrn6  | 44.8 | 0.017191 | 0.000831 | 0.282981 | 6.9  | 1.3 | -0.97 |
| Adamello | MAT4 | Amph-gabbro  | Zrn7  | 39.4 | 0.036598 | 0.002013 | 0.283095 | 10.9 | 2.1 | -0.94 |
| Adamello | MAT4 | Amph-gabbro  | Zrn7  | 42.4 | 0.026145 | 0.001535 | 0.283063 | 9.8  | 1.4 | -0.95 |
| Adamello | MAT4 | Amph-gabbro  | Zrn8  | 43.3 | 0.101592 | 0.004683 | 0.283060 | 9.6  | 1.2 | -0.86 |
| Adamello | MAT4 | Amph-gabbro  | Zrn8  | 41.3 | 0.019994 | 0.000922 | 0.282997 | 7.5  | 1.0 | -0.97 |
| Adamello | MAT4 | Amph-gabbro  | Zrn9  | 42.0 | 0.013228 | 0.000681 | 0.282943 | 5.6  | 1.2 | -0.98 |
| Adamello | MAT4 | Amph-gabbro  | Zrn9  | 43.0 | 0.079759 | 0.003750 | 0.282937 | 5.3  | 1.2 | -0.89 |
| Adamello | MAT4 | Amph-gabbro  | Zrn10 | 40.8 | 0.083650 | 0.004375 | 0.282973 | 6.5  | 1.2 | -0.87 |
| Adamello | MAT4 | Amph-gabbro  | Zrn10 | 42.8 | 0.003891 | 0.000227 | 0.283014 | 8.1  | 1.1 | -0.99 |
| Adamello | MAT4 | Amph-gabbro  | Zrn11 | 39.9 | 0.051938 | 0.002617 | 0.283015 | 8.0  | 1.3 | -0.92 |
| Adamello | MAT4 | Amph-gabbro  | Zrn11 | 42.2 | 0.041755 | 0.001882 | 0.283047 | 9.2  | 1.0 | -0.94 |
| Adamello | MAT4 | Amph-gabbro  | Zrn12 | 41.1 | 0.049000 | 0.002225 | 0.283055 | 9.5  | 1.2 | -0.93 |
| Adamello | MAT4 | Amph-gabbro  | Zrn13 | 41.2 | 0.062150 | 0.003038 | 0.282976 | 6.7  | 1.0 | -0.91 |
| Adamello | MAT4 | Amph-gabbro  | Zrn14 | 40.9 | 0.080871 | 0.004276 | 0.283026 | 8.4  | 1.2 | -0.87 |
| Adamello | MAT4 | Amph-gabbro  | Zrn14 | 41.4 | 0.050489 | 0.002791 | 0.282981 | 6.8  | 1.4 | -0.92 |
| Adamello | MAT4 | Amph-gabbro  | Zrn15 | 39.5 | 0.030186 | 0.001631 | 0.283052 | 9.4  | 1.2 | -0.95 |
| Adamello | MAT4 | Amph-gabbro  | Zrn15 | 41.0 | 0.020994 | 0.001246 | 0.283005 | 7.8  | 1.1 | -0.96 |
| Adamello | MAT4 | Amph-gabbro  | Zrn15 | 41.0 | 1.200000 | 0.002188 | 0.283015 | 8.1  | 1.1 | -0.93 |
| Adamello | MAT4 | Amph-gabbro  | Zrn16 | 41.2 | 0.091946 | 0.004297 | 0.283003 | 7.6  | 1.3 | -0.87 |
| Adamello | MAT4 | Amph-gabbro  | Zrn16 | 40.8 | 0.032005 | 0.001572 | 0.282996 | 7.4  | 1.2 | -0.95 |
| Adamello | MAT4 | Amph-gabbro  | Zrn17 | 42.0 | 0.046508 | 0.002081 | 0.283002 | 7.6  | 1.6 | -0.94 |
| Adamello | MAT4 | Amph-gabbro  | Zrn17 | 41.3 | 0.026482 | 0.001300 | 0.282978 | 6.8  | 1.2 | -0.96 |
| Adamello | MAT4 | Amph-gabbro  | Zrn18 | 40.7 | 0.059764 | 0.002979 | 0.283071 | 10.0 | 1.4 | -0.91 |
| Adamello | MAT4 | Amph-gabbro  | Zrn18 | 38.7 | 0.032137 | 0.001425 | 0.283017 | 8.2  | 1.2 | -0.96 |
| Adamello | MAT4 | Amph-gabbro  | Zrn19 | 44.1 | 0.062059 | 0.003229 | 0.282974 | 6.6  | 1.6 | -0.90 |
| Adamello | MAT4 | Amph-gabbro  | Zrn19 | 46.3 | 0.018413 | 0.001031 | 0.282993 | 7.3  | 1.1 | -0.97 |
| Adamello | MAT4 | Amph-gabbro  | Zrn20 | 41.8 | 0.084761 | 0.004978 | 0.283040 | 8.9  | 1.5 | -0.85 |
| Adamello | MAT4 | Amph-gabbro  | Zrn20 | 49.5 | 0.062129 | 0.003184 | 0.283013 | 7.9  | 1.5 | -0.90 |
| Adamello | MAT4 | Amph-gabbro  | Zrn20 | 39.6 | 0.009712 | 0.000535 | 0.282977 | 6.8  | 1.2 | -0.98 |
| Adamello | MAT4 | Amph-gabbro  | Zrn21 | 45.9 | 0.028519 | 0.001548 | 0.283013 | 8.0  | 1.3 | -0.95 |
| Adamello | MAT4 | Amph-gabbro  | Zrn21 | 40.2 | 0.060968 | 0.003302 | 0.282975 | 6.6  | 1.0 | -0.90 |
| Adamello | MAT4 | Amph-gabbro  | Zrn24 | 43.1 | 0.012564 | 0.000658 | 0.282988 | 7.2  | 1.0 | -0.98 |
| Adamello | MAT4 | Amph-gabbro  | Zrn24 | 42.7 | 0.026620 | 0.001278 | 0.283038 | 8.9  | 1.0 | -0.96 |
| Adamello | MAT4 | Amph-gabbro  | Zrn25 | 41.2 | 0.035373 | 0.001624 | 0.282978 | 6.8  | 1.2 | -0.95 |
| Adamello | MAT4 | Amph-gabbro  | Zrn25 | 42.9 | 0.020873 | 0.001040 | 0.282975 | 6.7  | 0.9 | -0.97 |
| Adamello | MAT4 | Amph-gabbro  | Zrn25 | 41.2 | 0.028067 | 0.001430 | 0.283019 | 8.2  | 1.1 | -0.96 |
| Adamello | MAT4 | Amph-gabbro  | Zrn26 | 43.2 | 0.047059 | 0.002306 | 0.283027 | 8.5  | 1.2 | -0.93 |
| Adamello | MAT4 | Amph-gabbro  | Zrn26 | 45.5 | 0.040797 | 0.001966 | 0.282973 | 6.6  | 1.1 | -0.94 |
| Bergell  | VS01 | Amph-diorite | Zrn1  | 30.7 | 0.031663 | 0.000933 | 0.282859 | 2.6  | 0.6 | -0.97 |
| Bergell  | VS01 | Amph-diorite | Zrn2  | 31.2 | 0.036170 | 0.001190 | 0.282877 | 3.2  | 0.7 | -0.96 |
| Bergell  | VS01 | Amph-diorite | Zrn3  | 29.5 | 0.074490 | 0.002981 | 0.282844 | 2.0  | 1.2 | -0.91 |
| Bergell  | VS01 | Amph-diorite | Zrn4  | 31.0 | 0.042351 | 0.001687 | 0.282886 | 3.5  | 0.9 | -0.95 |
| Bergell  | VS01 | Amph-diorite | Zrn5  | 29.2 | 0.046236 | 0.001827 | 0.282841 | 1.9  | 0.6 | -0.94 |
| Bergell  | VS01 | Amph-diorite | Zrn6  | 30.8 | 0.016647 | 0.000579 | 0.282881 | 3.4  | 0.7 | -0.98 |
| Bergell  | VS01 | Amph-diorite | Zrn7  | 29.1 | 0.088806 | 0.002700 | 0.282846 | 2.1  | 0.8 | -0.92 |
| Bergell  | VS01 | Amph-diorite | Zrn8  | 31.0 | 0.025759 | 0.000884 | 0.282821 | 1.3  | 0.7 | -0.97 |
| Bergell  | VS01 | Amph-diorite | Zrn9  | 30.7 | 0.041542 | 0.001629 | 0.282835 | 1.7  | 0.6 | -0.95 |
| Bergell  | VS01 | Amph-diorite | Zrn10 | 30.1 | 0.024515 | 0.000815 | 0.282864 | 2.8  | 0.6 | -0.98 |
| Bergell  | VS01 | Amph-diorite | Zrn11 | 30.9 | 0.027562 | 0.001361 | 0.282900 | 4.0  | 0.6 | -0.96 |
| Bergell  | VS01 | Amph-diorite | Zrn12 | 31.3 | 0.025593 | 0.000829 | 0.282865 | 2.8  | 0.6 | -0.98 |
| Bergell  | VS01 | Amph-diorite | Zrn13 | 30.5 | 0.097980 | 0.002957 | 0.282912 | 4.4  | 0.7 | -0.91 |
| Bergell  | VS01 | Amph-diorite | Zrn14 | 30.9 | 0.061694 | 0.001909 | 0.282879 | 3.3  | 0.6 | -0.94 |
| Bergell  | VS01 | Amph-diorite | Zrn15 | 30.2 | 0.062055 | 0.002197 | 0.282894 | 3.8  | 0.7 | -0.93 |
| Bergell  | VS01 | Amph-diorite | Zrn16 | 31.7 | 0.020565 | 0.000765 | 0.282863 | 2.7  | 0.6 | -0.98 |
| Bergell  | VS01 | Amph-diorite | Zrn17 | 30.0 | 0.009277 | 0.000363 | 0.282845 | 2.1  | 0.5 | -0.99 |
| Bergell  | VS01 | Amph-diorite | Zrn18 | 31.4 | 0.051878 | 0.001570 | 0.282898 | 4.0  | 0.7 | -0.95 |
| Bergell  | VS01 | Amph-diorite | Zrn19 | 31.0 | 0.011143 | 0.000412 | 0.282860 | 2.6  | 0.5 | -0.99 |
| Bergell  | VS01 | Amph-diorite | Zrn20 | 31.0 | 0.026220 | 0.000878 | 0.282851 | 2.3  | 0.6 | -0.97 |
| Bergell  | VS01 | Amph-diorite | Zrn21 | 32.9 | 0.019427 | 0.000775 | 0.282856 | 2.5  | 1.0 | -0.98 |
| Bergell  | VS04 | Amph-diorite | Zrn1  | 29.8 | 0.021744 | 0.000733 | 0.282872 | 3.1  | 0.9 | -0.98 |

|         |      |              |       |      |          |          |          |     |     |       |
|---------|------|--------------|-------|------|----------|----------|----------|-----|-----|-------|
| Bergell | VS04 | Amph-diorite | Zrn2  | 30.9 | 0.025735 | 0.000879 | 0.282848 | 2.2 | 0.6 | -0.97 |
| Bergell | VS04 | Amph-diorite | Zrn3  | 29.7 | 0.037360 | 0.001200 | 0.282882 | 3.4 | 0.6 | -0.96 |
| Bergell | VS04 | Amph-diorite | Zrn4  | 31.0 | 0.049037 | 0.001556 | 0.282846 | 2.1 | 0.6 | -0.95 |
| Bergell | VS04 | Amph-diorite | Zrn5  | 30.7 | 0.026535 | 0.000829 | 0.282898 | 4.0 | 0.6 | -0.98 |
| Bergell | VS04 | Amph-diorite | Zrn6  | 30.3 | 0.031689 | 0.001060 | 0.282861 | 2.7 | 0.5 | -0.97 |
| Bergell | VS04 | Amph-diorite | Zrn7  | 32.5 | 0.016020 | 0.000517 | 0.282879 | 3.3 | 0.5 | -0.98 |
| Bergell | VS04 | Amph-diorite | Zrn8  | 30.9 | 0.015730 | 0.000532 | 0.282832 | 1.7 | 0.5 | -0.98 |
| Bergell | VS04 | Amph-diorite | Zrn9  | 30.8 | 0.041333 | 0.001314 | 0.282884 | 3.5 | 0.7 | -0.96 |
| Bergell | VS04 | Amph-diorite | Zrn10 | 30.9 | 0.039347 | 0.001257 | 0.282889 | 3.7 | 0.7 | -0.96 |
| Bergell | VS04 | Amph-diorite | Zrn11 | 30.6 | 0.058039 | 0.001826 | 0.282859 | 2.6 | 0.7 | -0.94 |
| Bergell | VS04 | Amph-diorite | Zrn12 | 29.4 | 0.034721 | 0.001426 | 0.282860 | 2.6 | 0.6 | -0.96 |
| Bergell | VS04 | Amph-diorite | Zrn13 | 31.1 | 0.027920 | 0.000893 | 0.282893 | 3.8 | 0.5 | -0.97 |
| Bergell | VS04 | Amph-diorite | Zrn14 | 29.8 | 0.025242 | 0.000934 | 0.282854 | 2.4 | 0.6 | -0.97 |
| Bergell | VS04 | Amph-diorite | Zrn15 | 30.5 | 0.047701 | 0.001659 | 0.282864 | 2.8 | 0.5 | -0.95 |
| Bergell | VS04 | Amph-diorite | Zrn16 | 30.0 | 0.028306 | 0.000960 | 0.282860 | 2.6 | 0.6 | -0.97 |
| Bergell | VS04 | Amph-diorite | Zrn17 | 30.1 | 0.040070 | 0.001274 | 0.282866 | 2.9 | 0.6 | -0.96 |
| Bergell | VS04 | Amph-diorite | Zrn18 | 30.5 | 0.119645 | 0.004709 | 0.282866 | 2.8 | 0.6 | -0.86 |
| Bergell | VS04 | Amph-diorite | Zrn19 | 31.7 | 0.083407 | 0.002571 | 0.282833 | 1.6 | 0.6 | -0.92 |
| Bergell | VS04 | Amph-diorite | Zrn20 | 30.9 | 0.072289 | 0.002883 | 0.282856 | 2.5 | 0.6 | -0.91 |
| Bergell | VS04 | Amph-diorite | Zrn21 | 29.2 | 0.046140 | 0.002091 | 0.282831 | 1.6 | 0.5 | -0.94 |
| Bergell | VS17 | Amph-gabbro  | Zrn1  | 30.4 | 0.025130 | 0.000785 | 0.282903 | 4.2 | 0.6 | -0.98 |
| Bergell | VS17 | Amph-gabbro  | Zrn2  | 30.6 | 0.023388 | 0.000787 | 0.282880 | 3.3 | 0.5 | -0.98 |
| Bergell | VS17 | Amph-gabbro  | Zrn3  | 30.9 | 0.034123 | 0.001236 | 0.282871 | 3.0 | 0.4 | -0.96 |
| Bergell | VS17 | Amph-gabbro  | Zrn4  | 31.4 | 0.032369 | 0.001165 | 0.282876 | 3.2 | 0.5 | -0.96 |
| Bergell | VS17 | Amph-gabbro  | Zrn5  | 32.6 | 0.019076 | 0.000606 | 0.282882 | 3.4 | 0.5 | -0.98 |
| Bergell | VS17 | Amph-gabbro  | Zrn6  | 31.4 | 0.109095 | 0.004457 | 0.282925 | 4.9 | 0.7 | -0.87 |
| Bergell | VS17 | Amph-gabbro  | Zrn7  | 31.6 | 0.064112 | 0.001887 | 0.282943 | 5.5 | 0.6 | -0.94 |
| Bergell | VS17 | Amph-gabbro  | Zrn8  | 31.3 | 0.035712 | 0.001213 | 0.282879 | 3.3 | 0.5 | -0.96 |
| Bergell | VS17 | Amph-gabbro  | Zrn9  | 31.8 | 0.055832 | 0.002322 | 0.282911 | 4.4 | 0.6 | -0.93 |
| Bergell | VS17 | Amph-gabbro  | Zrn10 | 31.1 | 0.065237 | 0.002033 | 0.282915 | 4.6 | 0.6 | -0.94 |
| Bergell | VS17 | Amph-gabbro  | Zrn11 | 31.2 | 0.064337 | 0.002639 | 0.282886 | 3.5 | 0.7 | -0.92 |
| Bergell | VS17 | Amph-gabbro  | Zrn12 | 31.3 | 0.077810 | 0.002361 | 0.282921 | 4.8 | 0.7 | -0.93 |
| Bergell | VS17 | Amph-gabbro  | Zrn13 | 30.9 | 0.029337 | 0.001055 | 0.282866 | 2.9 | 0.6 | -0.97 |
| Bergell | VS17 | Amph-gabbro  | Zrn14 | 31.8 | 0.029306 | 0.000970 | 0.282835 | 1.7 | 0.6 | -0.97 |
| Bergell | VS17 | Amph-gabbro  | Zrn15 | 31.3 | 0.019626 | 0.000648 | 0.282890 | 3.7 | 0.5 | -0.98 |
| Bergell | VS17 | Amph-gabbro  | Zrn16 | 32.1 | 0.028238 | 0.000849 | 0.282889 | 3.6 | 0.5 | -0.97 |
| Bergell | VS17 | Amph-gabbro  | Zrn17 | 31.1 | 0.051210 | 0.001536 | 0.282891 | 3.7 | 0.6 | -0.95 |
| Bergell | VS17 | Amph-gabbro  | Zrn18 | 31.6 | 0.042003 | 0.001557 | 0.282850 | 2.3 | 0.6 | -0.95 |
| Bergell | VS17 | Amph-gabbro  | Zrn19 | 31.0 | 0.084920 | 0.002929 | 0.282895 | 3.8 | 0.5 | -0.91 |
| Bergell | VS17 | Amph-gabbro  | Zrn20 | 32.5 | 0.051003 | 0.001744 | 0.282920 | 4.7 | 0.5 | -0.95 |
| Bergell | VS17 | Amph-gabbro  | Zrn21 | 33.8 | 0.030510 | 0.001033 | 0.282914 | 4.5 | 0.8 | -0.97 |
