# Supplementary material
Source: publisher figshare collection journal article supplement (https://geolsoc.figshare.com/articles/dataset/_/3453767)
Supplement: Supplementary file 2 [file 1]

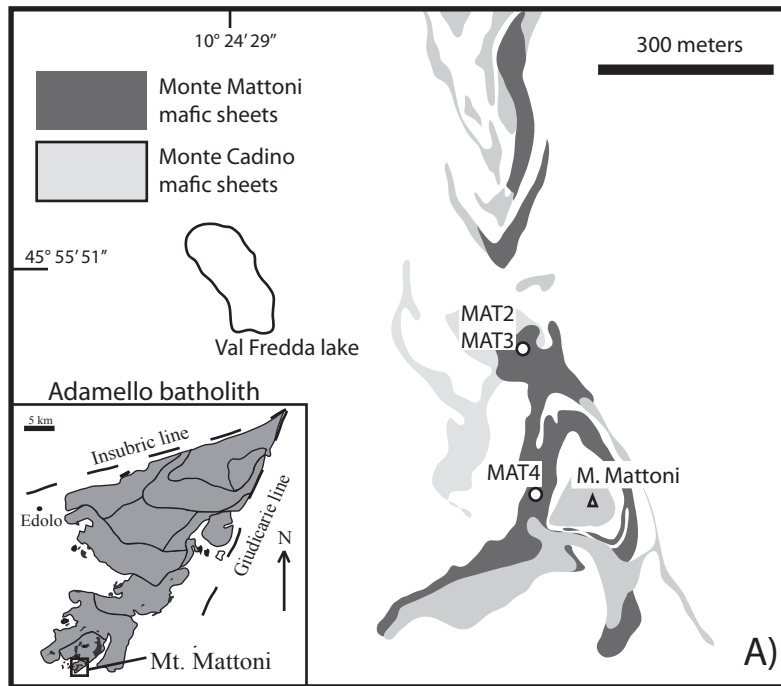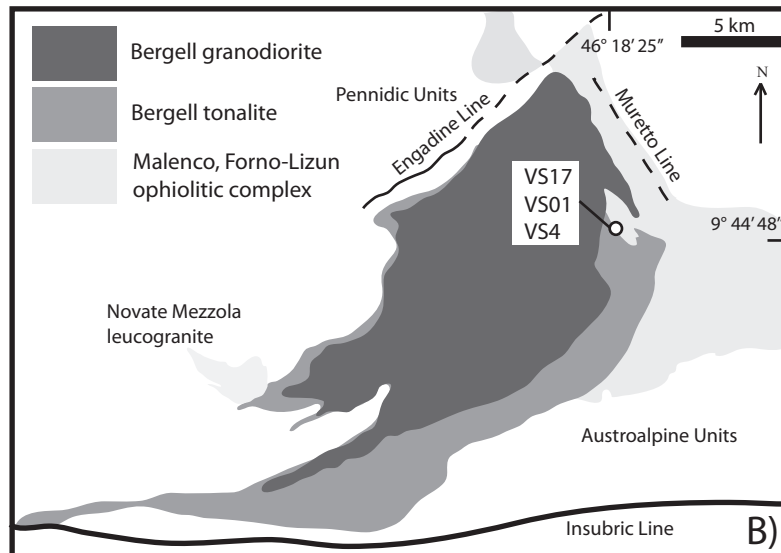

| Sample | Rock type    | Location              | Longitude   | Latitude    |
|--------|--------------|-----------------------|-------------|-------------|
| MAT2   | hornblendite | Mt. Mattoni, Adamello | 45° 55' 31" | 10° 24' 32" |
| MAT3   | hornblendite | Mt. Mattoni, Adamello | 45° 55' 31" | 10° 24' 32" |
| MAT4   | Amph-gabbro  | Mt. Mattoni, Adamello | 45° 55' 23" | 10° 24' 28" |
| VS01   | Amph-diorite | Val Sissone, Bergell  | 46° 18' 25" | 9° 44' 48"  |
| VS4    | Amph-diorite | Val Sissone, Bergell  | 46° 18' 25" | 9° 44' 48"  |
| VS17   | Amph-gabbro  | Val Sissone, Bergell  | 46° 18' 25" | 9° 44' 48"  |

### Supplementary Material 1.

Simplified geological maps of the sampling areas in the Adamello (A) and in the Bergell (B) intrusions. White circles report the location of selected samples. Maps are after Blundy & Sparks (1992) for the Mt. Mattoni area and Gregory et al. (2009) for the Bergell intrusion. The table reports sample co-ordinates.
