# Supplementary material
Source: publisher figshare collection journal article supplement (https://geolsoc.figshare.com/articles/dataset/_/3453767)
Supplement: Supplementary file 5 [file 1]

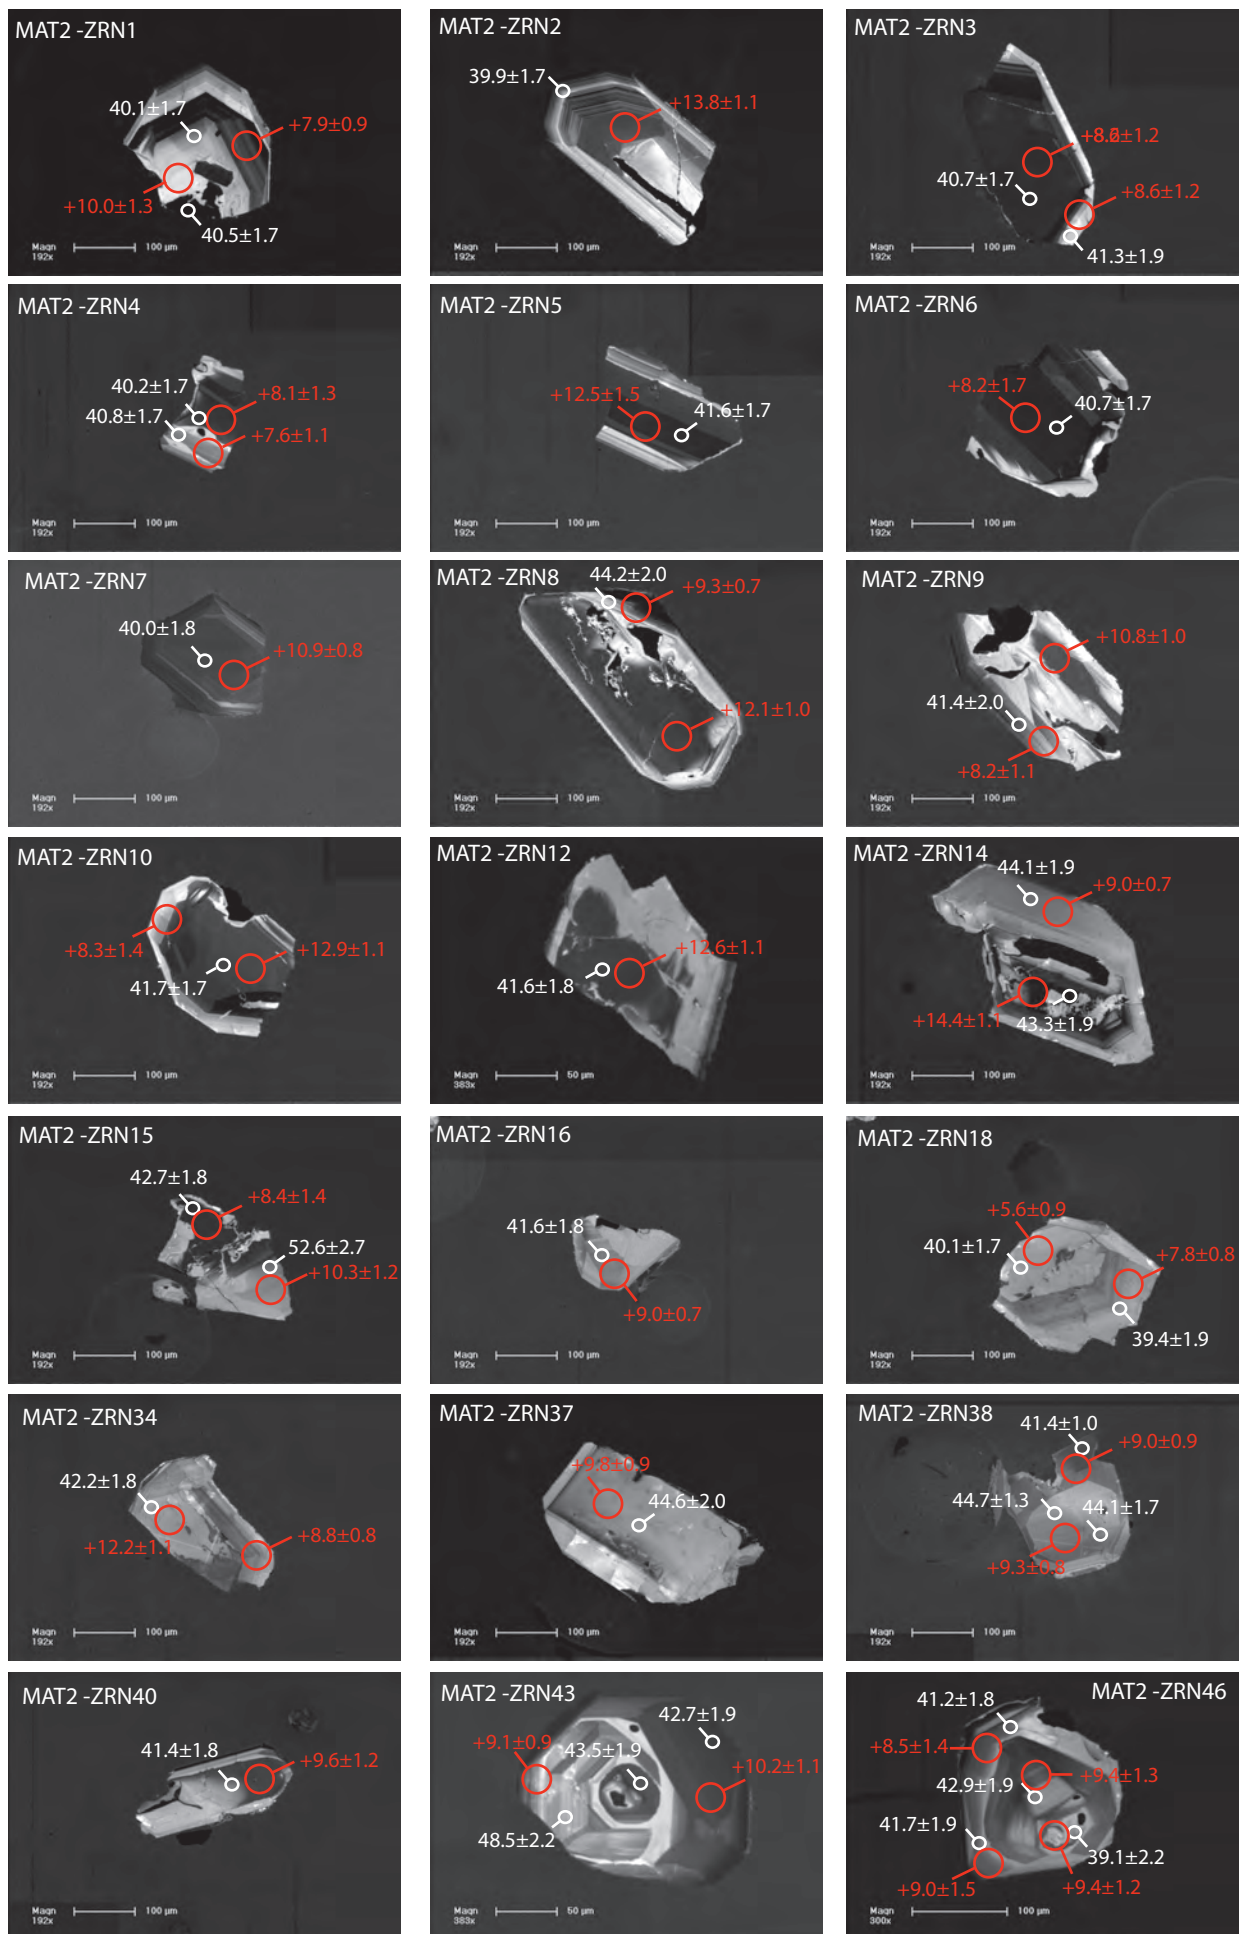

Tav.1 CL images of zircons in MAT2 hornblendite from the Adamello batholith. U-Pb ages (with numbers) are from Tiepolo et al. (2011). Red numbers are epsilon Hf(t) values. Errors are 2sigma.

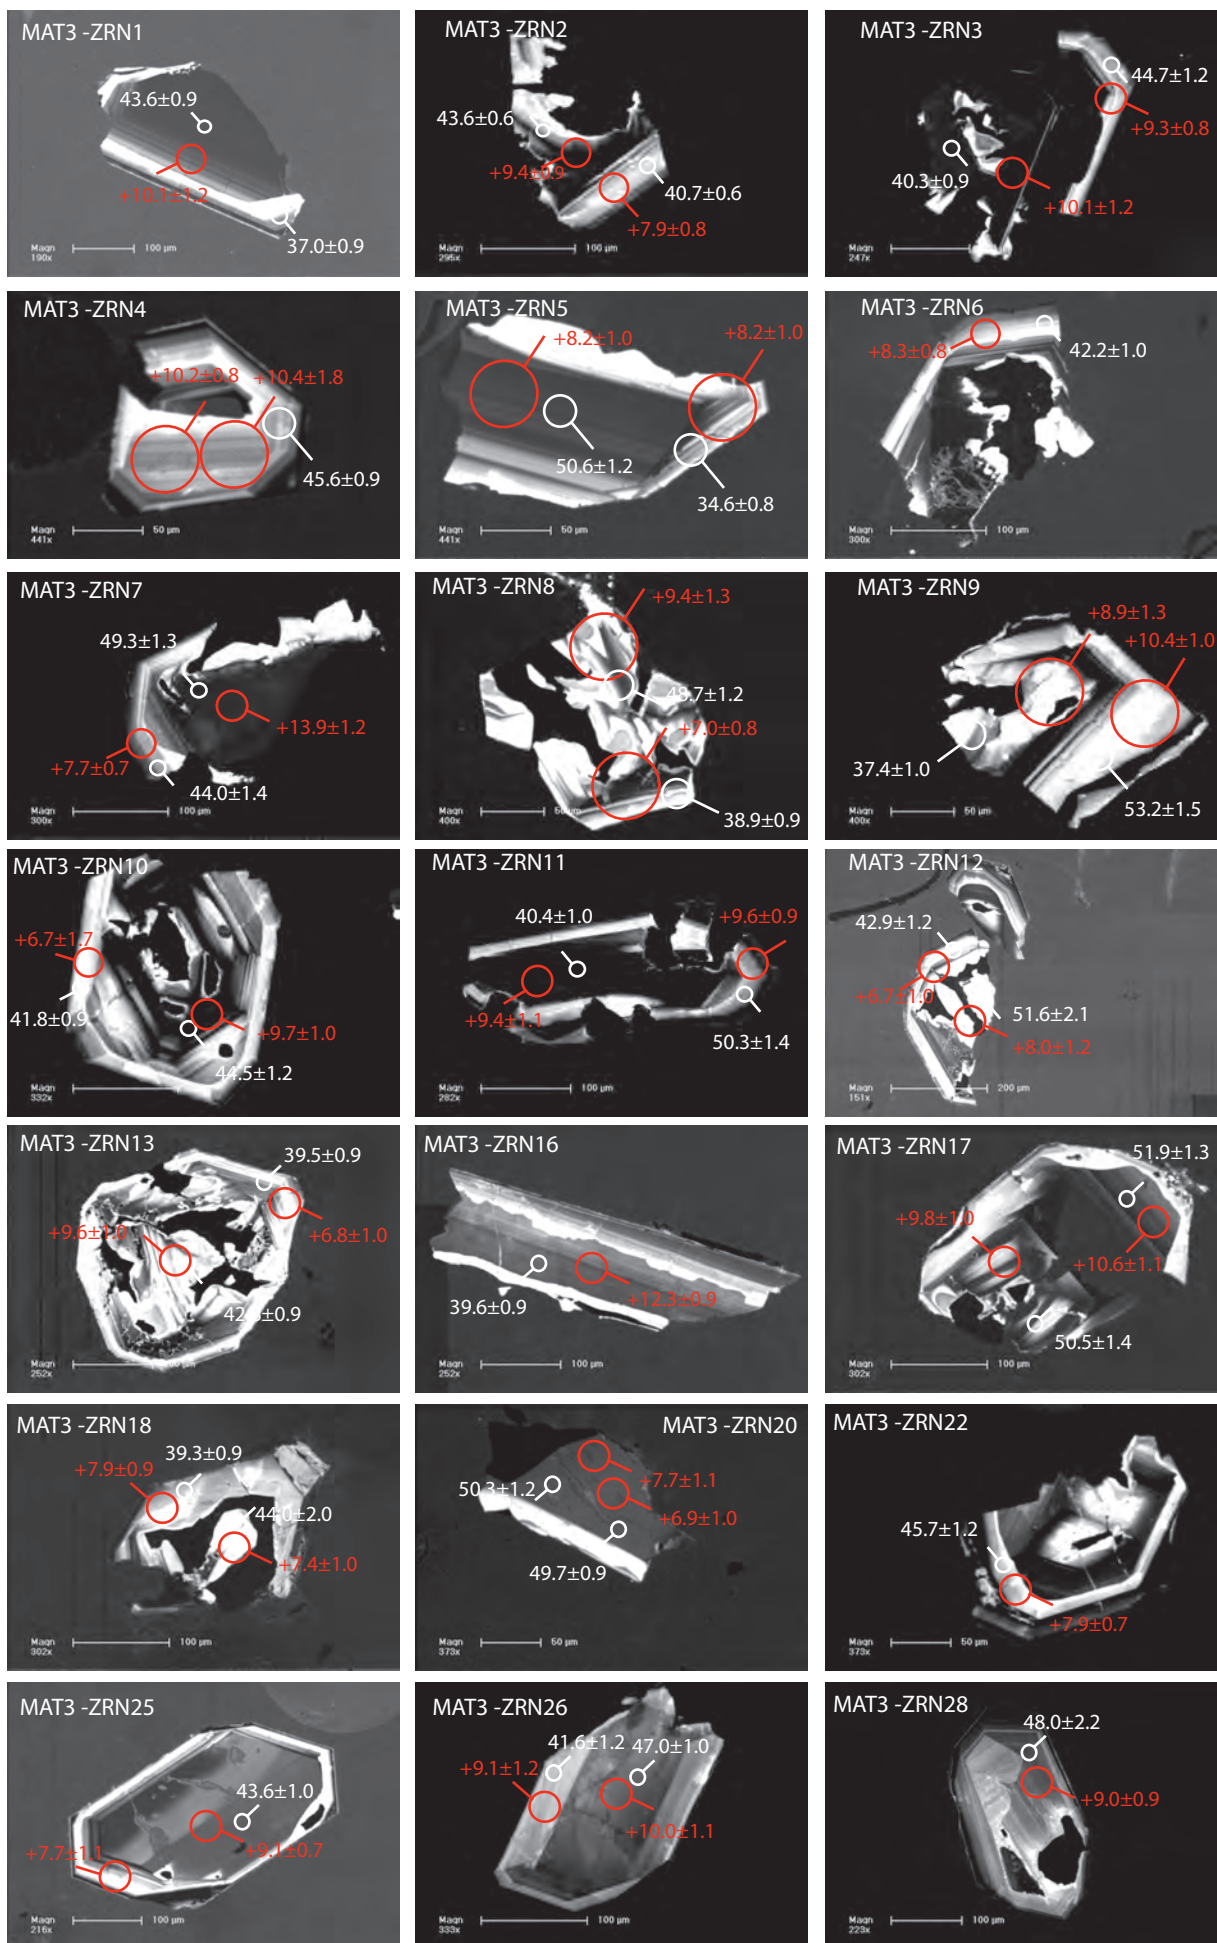

Tav.2 CL images of zircons in MAT3 hornblende from the Adamello batholith. U-Pb ages (with numbers) are from Tiepolo et al. (2011). Red numbers are epsilon Hf(t) values. Errors are 2sigma.

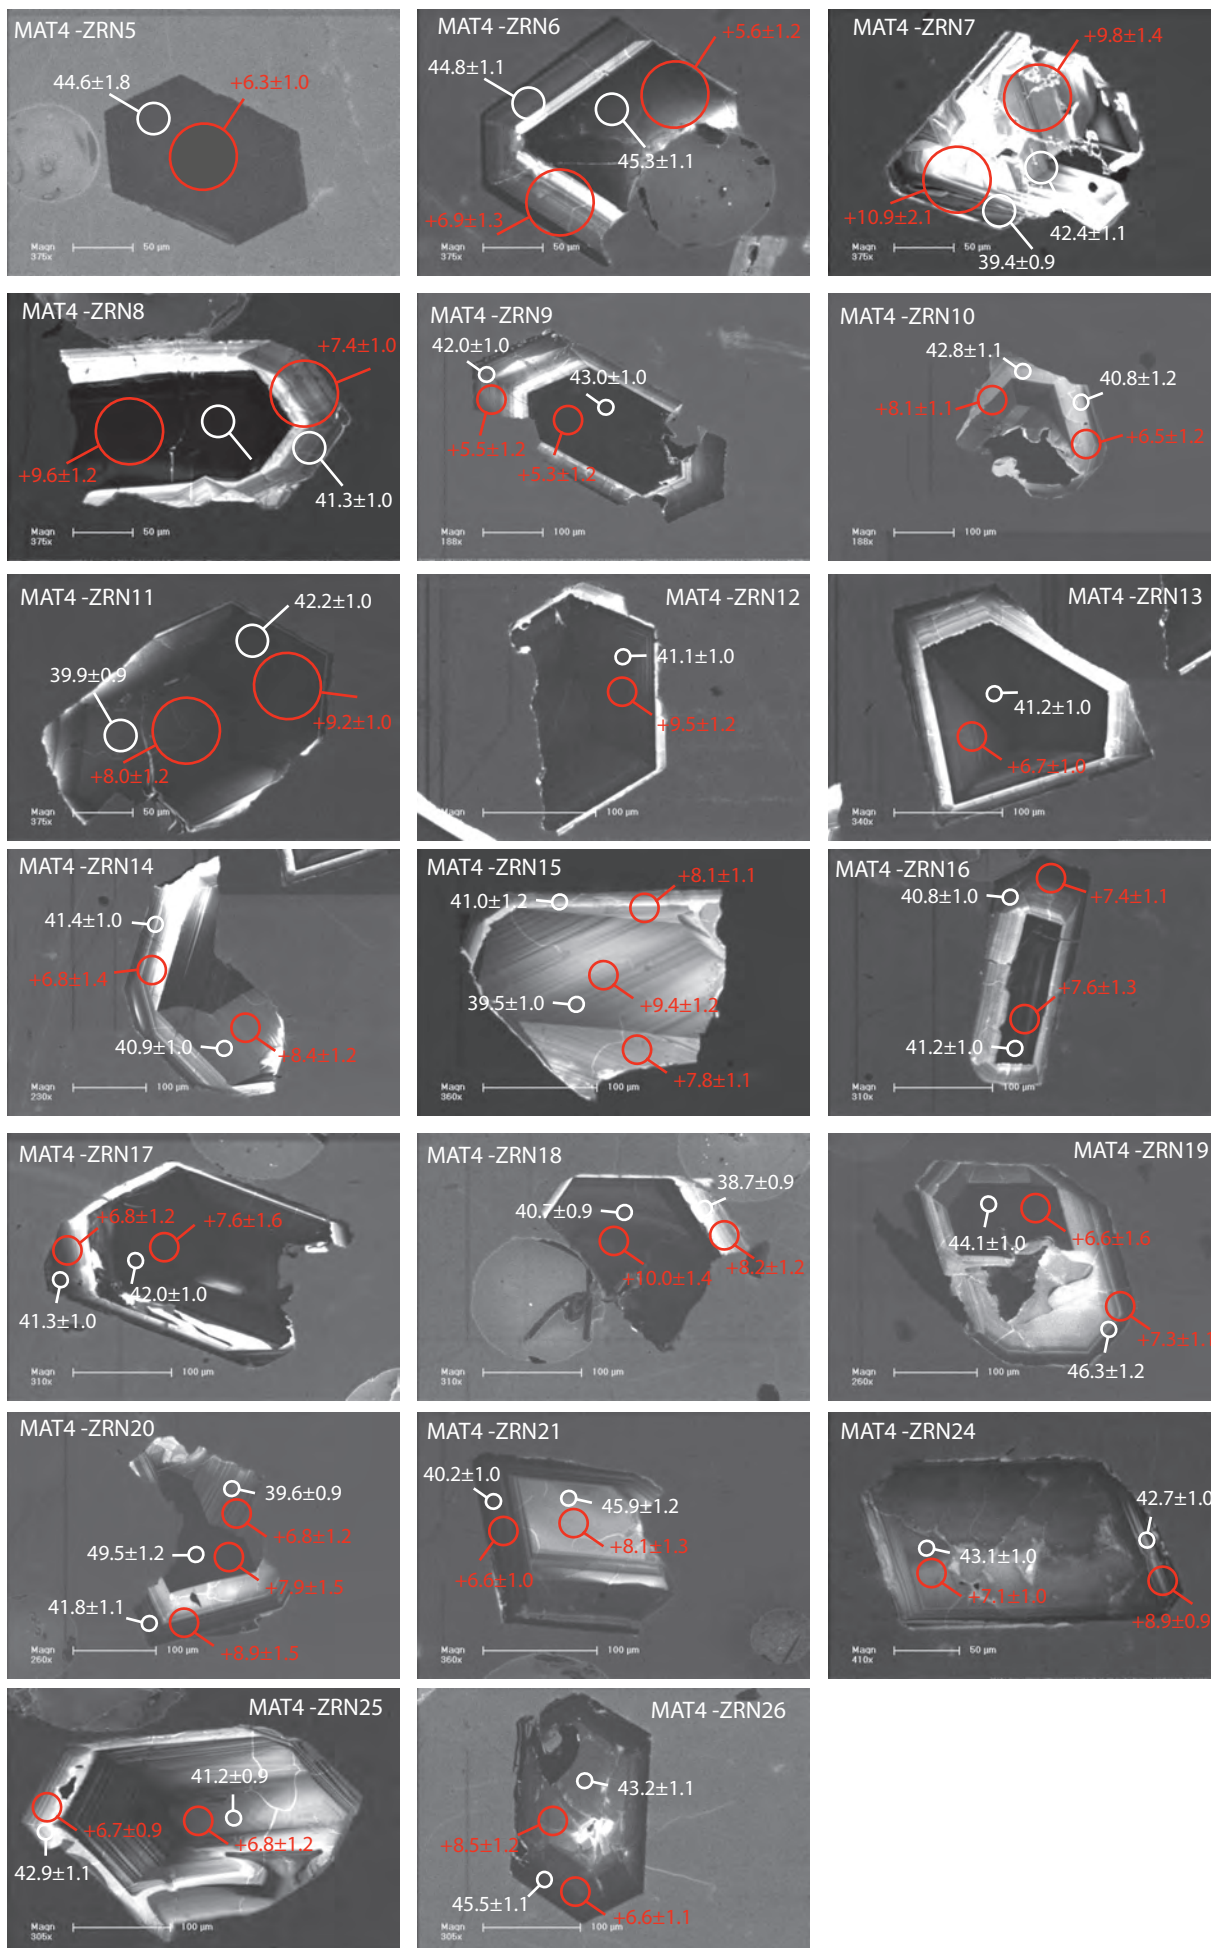

Tav.3 CL images of zircons in MAT4 Amph-gabbro from the Adamello batholith. Withe numbers are U-Pb ages and red numbers are epsilon Hf(t) values. Errors are 2sigma.

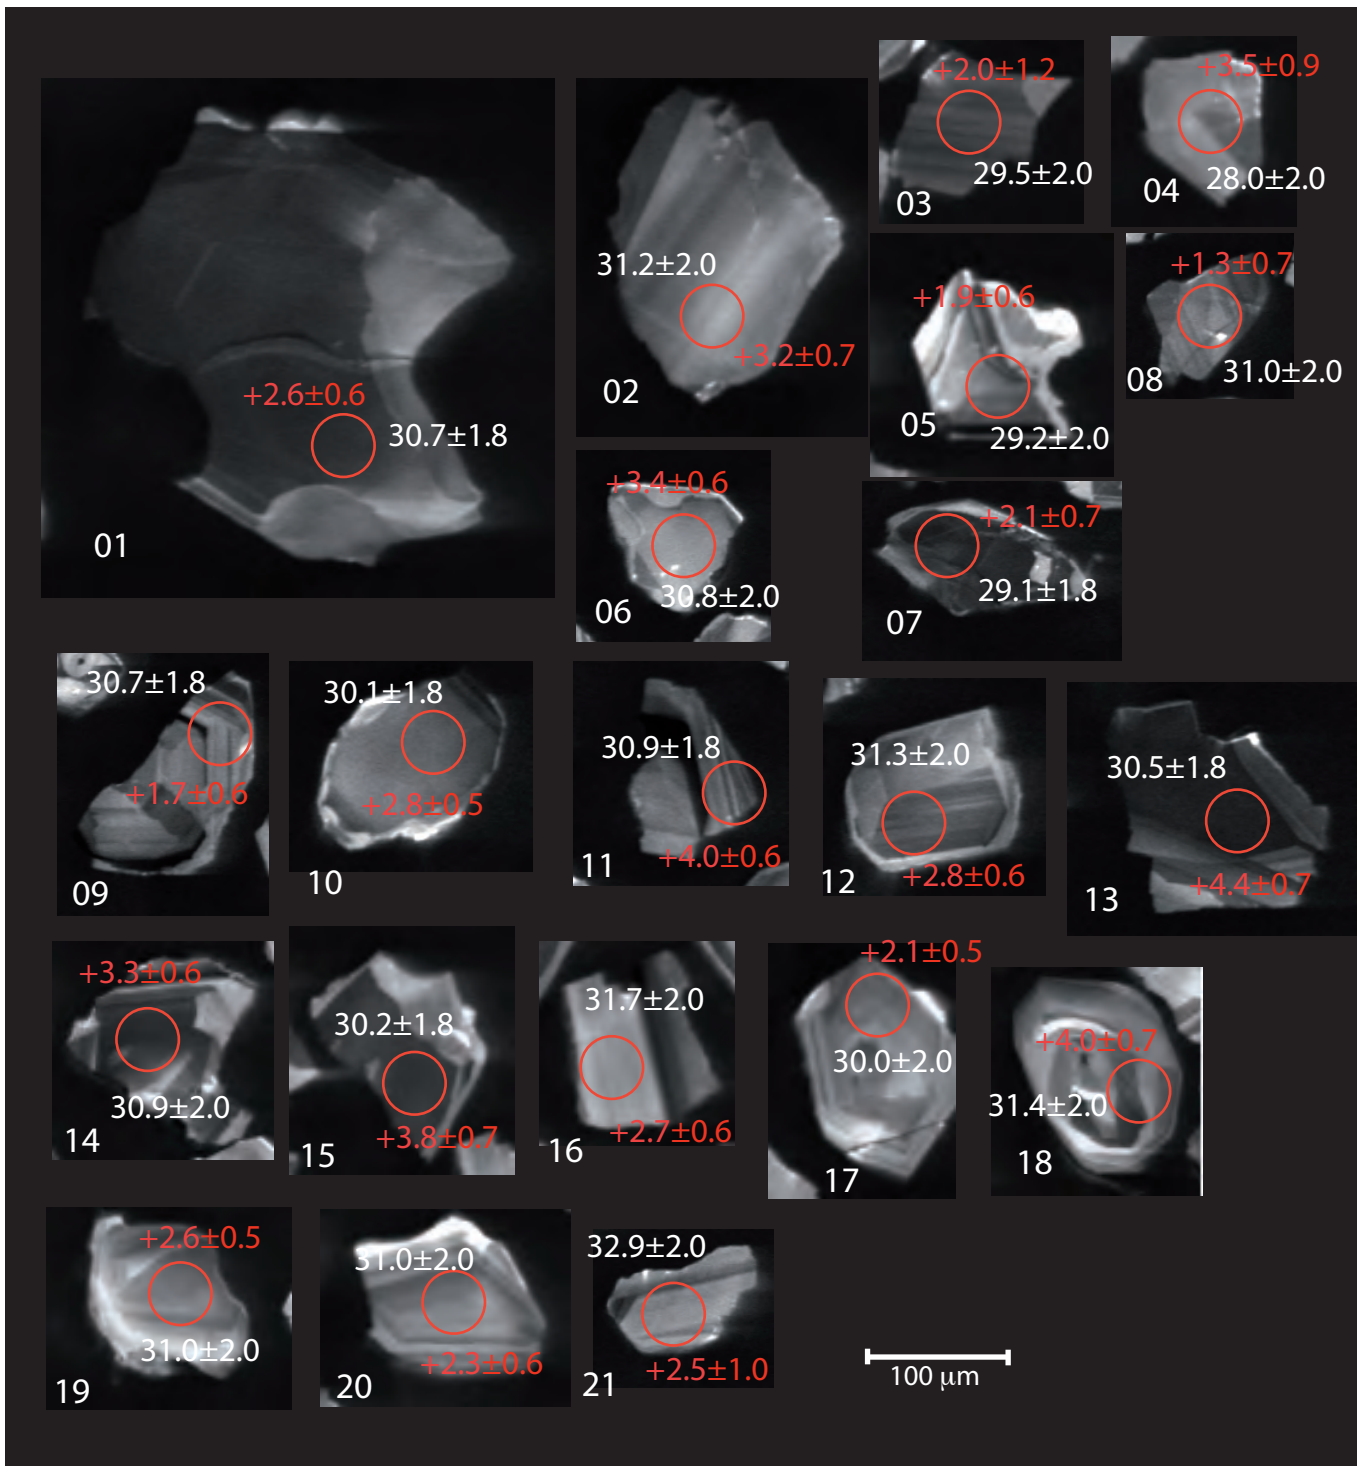

Tav.4 CL images of zircons in VS01 Amph-diorite from the Bergell pluton. Withe numbers are U-Pb ages and red numbers are epsilon Hf(t) values. Errors are 2sigma.

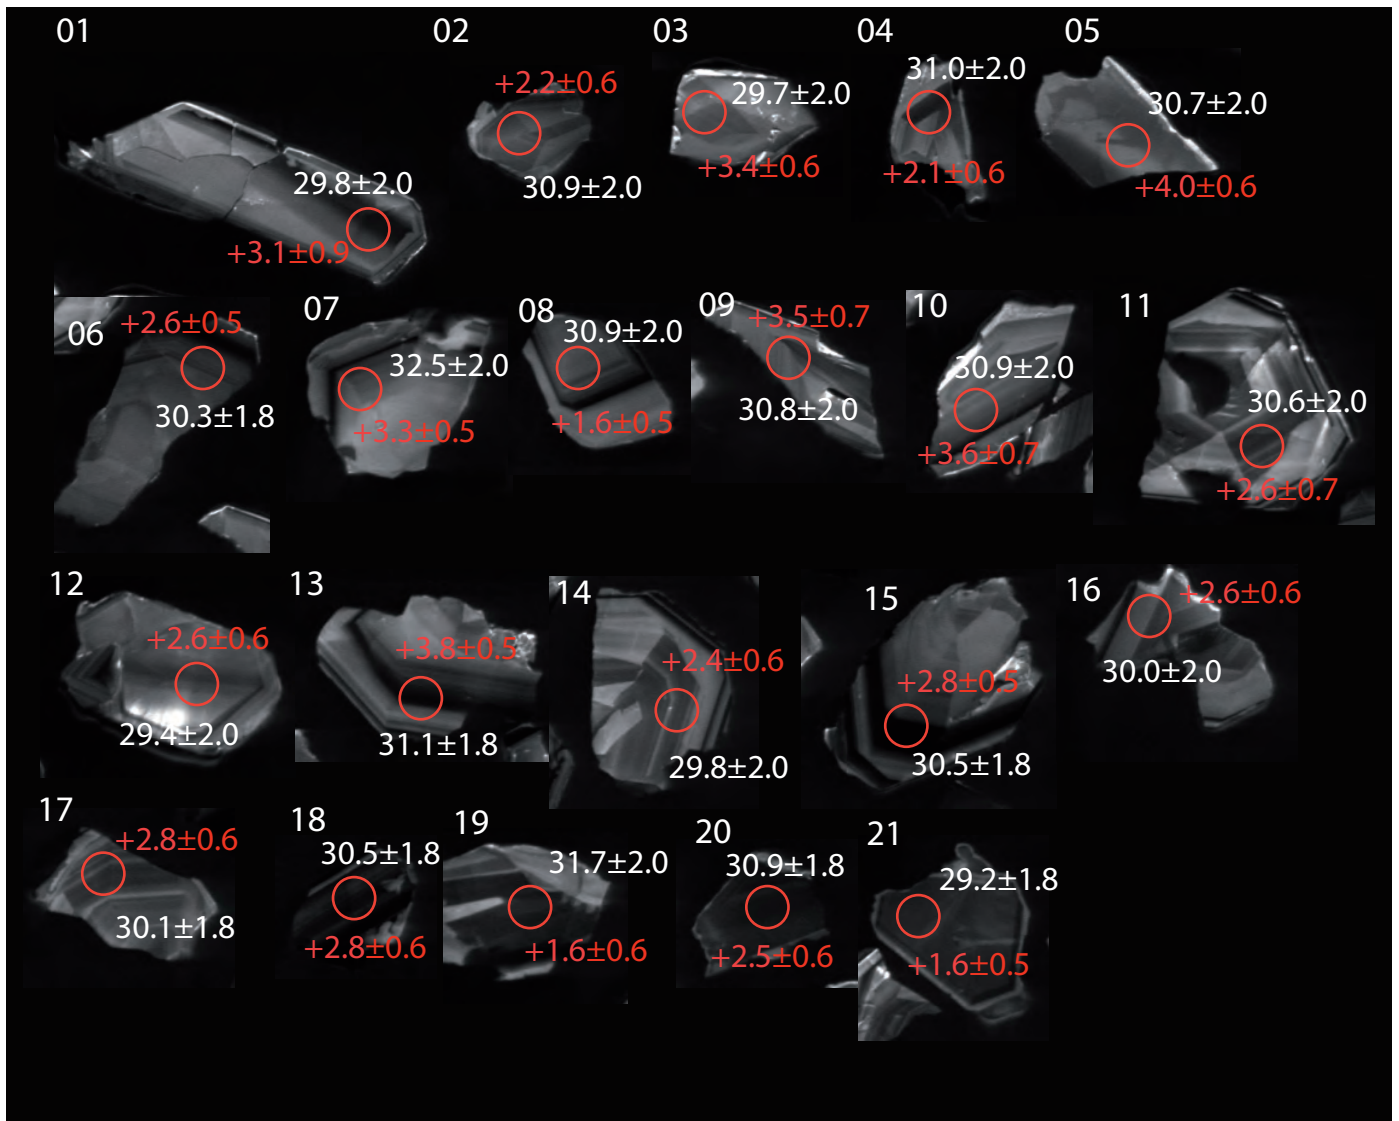

Tav.5 CI images of zircons in VS4 Amph-diorite from the Bergell pluton. Withe num-  
bers are U-Pb ages and red numbers are epsilon Hf(t) values. Errors are 2sigma.

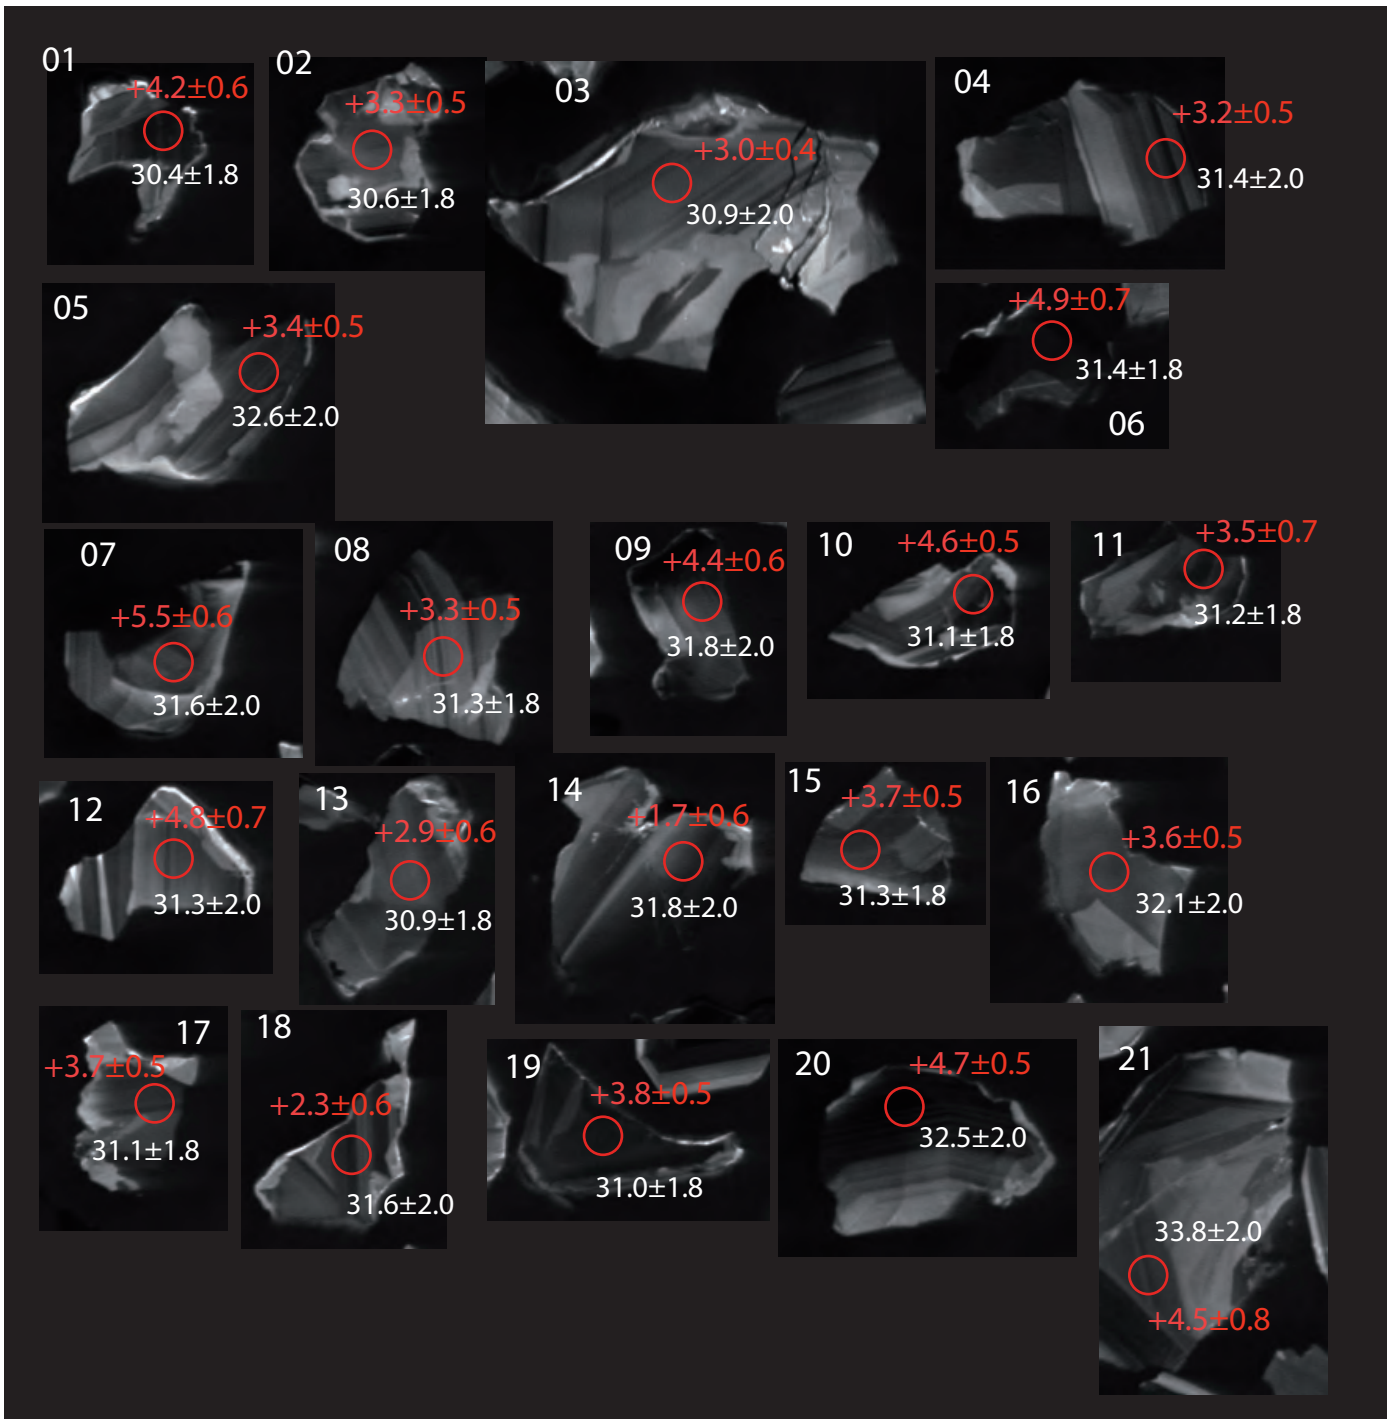

Tav.6 Cl images of zircons in VS17 Amph-gabbro from the Bergell pluton. Withe numbers are U-Pb ages and red numbers are epsilon Hf(t) values. Errors are 2sigma.
