# Supplementary material
Source: publisher figshare collection journal article supplement (https://geolsoc.figshare.com/articles/dataset/_/3453767)
Supplement: Supplementary file 6 [file 1]

Supplementary material 2. U-Pb age results

| Location | Sample | Rock type    | Grain# | Analysis | Isotopic ratios                      |        |                                     |        |                                     | Ages (Ma) |      |                                     |     |                                     |     |           |
|----------|--------|--------------|--------|----------|--------------------------------------|--------|-------------------------------------|--------|-------------------------------------|-----------|------|-------------------------------------|-----|-------------------------------------|-----|-----------|
|          |        |              |        |          | <sup>207</sup> Pb/ <sup>206</sup> Pb | 1σ     | <sup>207</sup> Pb/ <sup>235</sup> U | 1σ     | <sup>206</sup> Pb/ <sup>238</sup> U | 1σ        | rho  | <sup>207</sup> Pb/ <sup>235</sup> U | 1σ  | <sup>206</sup> Pb/ <sup>238</sup> U | 1σ  | % of conc |
| Adamello | Mat4   | Amph-gabbro  | Zm5    | Oc10b005 | 0.0477                               | 0.0006 | 0.0457                              | 0.0006 | 0.0069                              | 0.0001    | 0.97 | 45.4                                | 0.8 | 44.8                                | 0.5 | 1.8%      |
| Adamello | Mat4   | Amph-gabbro  | Zm6    | Oc10b006 | 0.0475                               | 0.0009 | 0.0458                              | 0.0008 | 0.0070                              | 0.0001    | 0.66 | 45.4                                | 0.8 | 44.8                                | 0.5 | 1.4%      |
| Adamello | Mat4   | Amph-gabbro  | Zm6    | Oc10b007 | 0.0470                               | 0.0007 | 0.0457                              | 0.0007 | 0.0071                              | 0.0001    | 0.84 | 45.4                                | 0.7 | 45.3                                | 0.5 | 0.2%      |
| Adamello | Mat4   | Amph-gabbro  | Zm7    | Oc10b008 | 0.0479                               | 0.0009 | 0.0405                              | 0.0007 | 0.0061                              | 0.0001    | 0.66 | 40.3                                | 0.7 | 39.4                                | 0.5 | 2.3%      |
| Adamello | Mat4   | Amph-gabbro  | Zm7    | Oc10b009 | 0.0469                               | 0.0011 | 0.0427                              | 0.0009 | 0.0066                              | 0.0001    | 0.56 | 42.4                                | 0.9 | 42.4                                | 0.5 | 0.0%      |
| Adamello | Mat4   | Amph-gabbro  | Zm8    | Oc10b010 | 0.0468                               | 0.0007 | 0.0415                              | 0.0006 | 0.0064                              | 0.0001    | 0.76 | 41.2                                | 0.6 | 41.3                                | 0.5 | -0.2%     |
| Adamello | Mat4   | Amph-gabbro  | Zm8    | Oc10b011 | 0.0461                               | 0.0006 | 0.0429                              | 0.0005 | 0.0067                              | 0.0001    | 0.93 | 42.6                                | 0.5 | 43.3                                | 0.5 | -1.6%     |
| Adamello | Mat4   | Amph-gabbro  | Zm9    | Oc10b012 | 0.0472                               | 0.0007 | 0.0426                              | 0.0006 | 0.0065                              | 0.0001    | 0.78 | 42.4                                | 0.6 | 42.0                                | 0.5 | 0.9%      |
| Adamello | Mat4   | Amph-gabbro  | Zm9    | Oc10b013 | 0.0475                               | 0.0006 | 0.0439                              | 0.0006 | 0.0067                              | 0.0001    | 0.90 | 43.6                                | 0.6 | 43.0                                | 0.5 | 1.3%      |
| Adamello | Mat4   | Amph-gabbro  | Zm10   | Oc10b014 | 0.0461                               | 0.0018 | 0.0404                              | 0.0015 | 0.0064                              | 0.0001    | 0.40 | 40.2                                | 1.5 | 40.8                                | 0.6 | -1.5%     |
| Adamello | Mat4   | Amph-gabbro  | Zm10   | Oc10b015 | 0.0459                               | 0.0009 | 0.0421                              | 0.0008 | 0.0067                              | 0.0001    | 0.66 | 41.9                                | 0.8 | 42.8                                | 0.5 | -2.2%     |
| Adamello | Mat4   | Amph-gabbro  | Zm11   | Oc10b016 | 0.0479                               | 0.0007 | 0.0411                              | 0.0005 | 0.0062                              | 0.0001    | 0.89 | 40.9                                | 0.5 | 39.9                                | 0.5 | 2.9%      |
| Adamello | Mat4   | Amph-gabbro  | Zm11   | Oc10b017 | 0.0457                               | 0.0007 | 0.0415                              | 0.0006 | 0.0066                              | 0.0001    | 0.79 | 41.3                                | 0.6 | 42.3                                | 0.5 | -2.4%     |
| Adamello | Mat4   | Amph-gabbro  | Zm12   | Oc10b018 | 0.0467                               | 0.0008 | 0.0415                              | 0.0007 | 0.0064                              | 0.0001    | 0.73 | 41.2                                | 0.7 | 41.1                                | 0.5 | 0.3%      |
| Adamello | Mat4   | Amph-gabbro  | Zm13   | Oc10b019 | 0.0471                               | 0.0006 | 0.0416                              | 0.0005 | 0.0064                              | 0.0001    | 0.97 | 41.4                                | 0.5 | 41.2                                | 0.5 | 0.4%      |
| Adamello | Mat4   | Amph-gabbro  | Zm13   | Oc10b020 | 0.0460                               | 0.0006 | 0.0393                              | 0.0005 | 0.0062                              | 0.0001    | 0.91 | 39.1                                | 0.5 | 39.8                                | 0.5 | -1.7%     |
| Adamello | Mat4   | Amph-gabbro  | Zm14   | Oc10b021 | 0.0466                               | 0.0011 | 0.0409                              | 0.0010 | 0.0064                              | 0.0001    | 0.55 | 40.7                                | 0.9 | 40.9                                | 0.5 | -0.3%     |
| Adamello | Mat4   | Amph-gabbro  | Zm14   | Oc10b022 | 0.0465                               | 0.0008 | 0.0413                              | 0.0007 | 0.0065                              | 0.0001    | 0.69 | 41.1                                | 0.7 | 41.4                                | 0.5 | -0.8%     |
| Adamello | Mat4   | Amph-gabbro  | Zm15   | Oc10b023 | 0.0466                               | 0.0012 | 0.0395                              | 0.0010 | 0.0062                              | 0.0001    | 0.51 | 39.3                                | 1.0 | 39.5                                | 0.5 | -0.5%     |
| Adamello | Mat4   | Amph-gabbro  | Zm15   | Oc10b024 | 0.0460                               | 0.0021 | 0.0404                              | 0.0018 | 0.0064                              | 0.0001    | 0.34 | 40.2                                | 1.8 | 41.0                                | 0.6 | -1.9%     |
| Adamello | Mat4   | Amph-gabbro  | Zm16   | Oc10b028 | 0.0466                               | 0.0006 | 0.0408                              | 0.0006 | 0.0064                              | 0.0001    | 0.90 | 40.6                                | 0.6 | 40.8                                | 0.5 | -0.4%     |
| Adamello | Mat4   | Amph-gabbro  | Zm16   | Oc10b029 | 0.0481                               | 0.0008 | 0.0426                              | 0.0007 | 0.0064                              | 0.0001    | 0.75 | 42.4                                | 0.7 | 41.3                                | 0.5 | 2.6%      |
| Adamello | Mat4   | Amph-gabbro  | Zm17   | Oc10b030 | 0.0465                               | 0.0006 | 0.0419                              | 0.0005 | 0.0065                              | 0.0001    | 0.99 | 41.6                                | 0.5 | 42.0                                | 0.5 | -0.7%     |
| Adamello | Mat4   | Amph-gabbro  | Zm17   | Oc10b031 | 0.0460                               | 0.0008 | 0.0406                              | 0.0007 | 0.0064                              | 0.0001    | 0.68 | 40.4                                | 0.7 | 41.3                                | 0.5 | -2.2%     |
| Adamello | Mat4   | Amph-gabbro  | Zm18   | Oc10b032 | 0.0473                               | 0.0006 | 0.0412                              | 0.0005 | 0.0063                              | 0.0001    | 0.97 | 41.0                                | 0.5 | 40.7                                | 0.5 | 0.8%      |
| Adamello | Mat4   | Amph-gabbro  | Zm18   | Oc10b033 | 0.0474                               | 0.0007 | 0.0393                              | 0.0005 | 0.0060                              | 0.0001    | 0.83 | 39.2                                | 0.5 | 38.7                                | 0.4 | 1.2%      |
| Adamello | Mat4   | Amph-gabbro  | Zm19   | Oc10b034 | 0.0480                               | 0.0006 | 0.0454                              | 0.0006 | 0.0069                              | 0.0001    | 0.89 | 45.1                                | 0.6 | 44.1                                | 0.5 | 2.3%      |
| Adamello | Mat4   | Amph-gabbro  | Zm19   | Oc10b035 | 0.0469                               | 0.0009 | 0.0466                              | 0.0009 | 0.0072                              | 0.0001    | 0.68 | 46.2                                | 0.9 | 46.3                                | 0.6 | -0.2%     |
| Adamello | Mat4   | Amph-gabbro  | Zm20   | Oc10b036 | 0.0479                               | 0.0008 | 0.0510                              | 0.0009 | 0.0077                              | 0.0001    | 0.70 | 50.5                                | 0.9 | 49.5                                | 0.6 | 2.0%      |
| Adamello | Mat4   | Amph-gabbro  | Zm20   | Oc10b037 | 0.0452                               | 0.0012 | 0.0405                              | 0.0010 | 0.0065                              | 0.0001    | 0.50 | 40.3                                | 1.0 | 41.8                                | 0.5 | -3.8%     |
| Adamello | Mat4   | Amph-gabbro  | Zm20   | Oc10b038 | 0.0525                               | 0.0009 | 0.0446                              | 0.0008 | 0.0062                              | 0.0001    | 0.69 | 44.3                                | 0.8 | 39.6                                | 0.5 | 10.6%     |
| Adamello | Mat4   | Amph-gabbro  | Zm21   | Oc10b039 | 0.0468                               | 0.0015 | 0.0458                              | 0.0015 | 0.0071                              | 0.0001    | 0.40 | 45.4                                | 1.5 | 45.9                                | 0.6 | -0.9%     |
| Adamello | Mat4   | Amph-gabbro  | Zm21   | Oc10b040 | 0.0479                               | 0.0010 | 0.0412                              | 0.0008 | 0.0063                              | 0.0001    | 0.64 | 41.0                                | 0.8 | 40.2                                | 0.5 | 2.1%      |
| Adamello | Mat4   | Amph-gabbro  | Zm24   | Oc10b041 | 0.0473                               | 0.0009 | 0.0437                              | 0.0008 | 0.0067                              | 0.0001    | 0.63 | 43.4                                | 0.8 | 43.1                                | 0.5 | 0.7%      |
| Adamello | Mat4   | Amph-gabbro  | Zm24   | Oc10b042 | 0.0469                               | 0.0006 | 0.0430                              | 0.0006 | 0.0067                              | 0.0001    | 0.89 | 42.7                                | 0.6 | 42.7                                | 0.5 | 0.0%      |
| Adamello | Mat4   | Amph-gabbro  | Zm25   | Oc10b043 | 0.0479                               | 0.0007 | 0.0423                              | 0.0005 | 0.0064                              | 0.0001    | 0.83 | 42.1                                | 0.5 | 41.2                                | 0.4 | 2.2%      |
| Adamello | Mat4   | Amph-gabbro  | Zm25   | Oc10b044 | 0.0476                               | 0.0013 | 0.0438                              | 0.0011 | 0.0067                              | 0.0001    | 0.48 | 43.6                                | 1.1 | 42.9                                | 0.5 | 1.5%      |
| Adamello | Mat4   | Amph-gabbro  | Zm26   | Oc10b045 | 0.0469                               | 0.0007 | 0.0458                              | 0.0007 | 0.0071                              | 0.0001    | 0.74 | 45.4                                | 0.7 | 45.5                                | 0.5 | -0.1%     |
| Adamello | Mat4   | Amph-gabbro  | Zm26   | Oc10b046 | 0.0479                               | 0.0019 | 0.0443                              | 0.0017 | 0.0067                              | 0.0001    | 0.35 | 44.0                                | 1.7 | 43.2                                | 0.6 | 1.8%      |
| Bergell  | VS01   | Amph-diorite | Zm1    | VS01 01  | 0.0499                               | 0.0010 | 0.0328                              | 0.0007 | 0.0048                              | 0.0001    | 1.48 | 32.8                                | 0.6 | 30.7                                | 0.9 | 6.4%      |
| Bergell  | VS01   | Amph-diorite | Zm2    | VS01 02  | 0.0435                               | 0.0014 | 0.0290                              | 0.0009 | 0.0049                              | 0.0002    | 1.02 | 29.0                                | 0.9 | 31.2                                | 1.0 | -7.6%     |
| Bergell  | VS01   | Amph-diorite | Zm3    | VS01 03  | 0.0499                               | 0.0017 | 0.0316                              | 0.0010 | 0.0046                              | 0.0002    | 1.02 | 31.6                                | 1.0 | 29.5                                | 1.0 | 6.6%      |
| Bergell  | VS01   | Amph-diorite | Zm4    | VS01 04  | 0.0461                               | 0.0044 | 0.0278                              | 0.0025 | 0.0044                              | 0.0002    | 0.41 | 28.0                                | 2.0 | 28.0                                | 1.0 | 0.0%      |
| Bergell  | VS01   | Amph-diorite | Zm5    | VS01 05  | 0.0461                               | 0.0020 | 0.0288                              | 0.0009 | 0.0045                              | 0.0001    | 0.97 | 28.9                                | 0.9 | 29.2                                | 0.9 | -1.0%     |
| Bergell  | VS01   | Amph-diorite | Zm6    | VS01 06  | 0.0497                               | 0.0017 | 0.0327                              | 0.0011 | 0.0048                              | 0.0002    | 0.95 | 33.0                                | 1.0 | 30.8                                | 1.0 | 6.7%      |
| Bergell  | VS01   | Amph-diorite | Zm7    | VS01 07  | 0.0524                               | 0.0014 | 0.0327                              | 0.0008 | 0.0045                              | 0.0001    | 1.25 | 32.6                                | 0.8 | 29.1                                | 0.9 | 10.7%     |
| Bergell  | VS01   | Amph-diorite | Zm8    | VS01 08  | 0.0447                               | 0.0022 | 0.0294                              | 0.0014 | 0.0048                              | 0.0002    | 0.71 | 29.0                                | 1.0 | 31.0                                | 1.0 | -6.9%     |
| Bergell  | VS01   | Amph-diorite | Zm9    | VS01 09  | 0.0460                               | 0.0010 | 0.0303                              | 0.0006 | 0.0048                              | 0.0001    | 1.48 | 30.3                                | 0.6 | 30.7                                | 0.9 | -1.3%     |
| Bergell  | VS01   | Amph-diorite | Zm10   | VS01 10  | 0.0461                               | 0.0020 | 0.0298                              | 0.0009 | 0.0047                              | 0.0001    | 0.94 | 29.8                                | 0.9 | 30.1                                | 0.9 | -1.0%     |
| Bergell  | VS01   | Amph-diorite | Zm11   | VS01 11  | 0.0486                               | 0.0008 | 0.0322                              | 0.0005 | 0.0048                              | 0.0001    | 1.87 | 32.2                                | 0.5 | 30.9                                | 0.9 | 4.0%      |
| Bergell  | VS01   | Amph-diorite | Zm12   | VS01 12  | 0.0450                               | 0.0011 | 0.0302                              | 0.0007 | 0.0049                              | 0.0002    | 1.33 | 30.2                                | 0.7 | 31.3                                | 1.0 | -3.6%     |
| Bergell  | VS01   | Amph-diorite | Zm13   | VS01 13  | 0.0461                               | 0.0028 | 0.0301                              | 0.0016 | 0.0047                              | 0.0001    | 0.57 | 30.0                                | 2.0 | 30.5                                | 0.9 | -1.7%     |
| Bergell  | VS01   | Amph-diorite | Zm14   | VS01 14  | 0.0474                               | 0.0010 | 0.0314                              | 0.0006 | 0.0048                              | 0.0002    | 1.56 | 31.4                                | 0.6 | 30.9                                | 1.0 | 1.6%      |
| Bergell  | VS01   | Amph-diorite | Zm15   | VS01 15  | 0.0472                               | 0.0010 | 0.0305                              | 0.0006 | 0.0047                              | 0.0001    | 1.45 | 30.5                                | 0.6 | 30.2                                | 0.9 | 1.0%      |
| Bergell  | VS01   | Amph-diorite | Zm16   | VS01 16  | 0.0486                               | 0.0008 | 0.0330                              | 0.0005 | 0.0049                              | 0.0002    | 1.89 | 32.9                                | 0.5 | 31.7                                | 1.0 | 3.6%      |
| Bergell  | VS01   | Amph-diorite | Zm17   | VS01 17  | 0.0478                               | 0.0019 | 0.0311                              | 0.0012 | 0.0047                              | 0.0002    | 0.89 | 31.0                                | 1.0 | 30.0                                | 1.0 | 3.2%      |
| Bergell  | VS01   | Amph-diorite | Zm18   | VS01 18  | 0.0473                               | 0.0013 | 0.0318                              | 0.0008 | 0.0049                              | 0.0002    | 1.22 | 31.8                                | 0.8 | 31.4                                | 1.0 | 1.3%      |
| Bergell  | VS01   | Amph-diorite | Zm19   | VS01 19  | 0.0484                               | 0.0013 | 0.0322                              | 0.0008 | 0.0048                              | 0.0002    | 1.21 | 32.2                                | 0.8 | 31.0                                | 1.0 | 3.7%      |
| Bergell  | VS01   | Amph-diorite | Zm20   | VS01 20  | 0.0486                               | 0.0021 | 0.0328                              | 0.0013 | 0.0049                              | 0.0002    | 0.83 | 33.0                                | 1.0 | 31.0                                | 1.0 | 6.1%      |
| Bergell  | VS01   | Amph-diorite | Zm21   | VS01 21  | 0.0485                               | 0.0009 | 0.0342                              | 0.0006 | 0.0051                              | 0.0002    | 1.64 | 34.1                                | 0.6 | 32.9                                | 1.0 | 3.5%      |
| Bergell  | VS04   | Amph-diorite | Zm1    | VS04 01  | 0.0489                               | 0.0020 | 0.0313                              | 0.0012 | 0.0046                              | 0.0002    | 0.86 | 31.0                                | 1.0 | 29.8                                | 1.0 | 3.9%      |
| Bergell  | VS04   | Amph-diorite | Zm2    | VS04 02  | 0.0477                               | 0.0011 | 0.0316                              | 0.0007 | 0.0048                              | 0.0002    | 1.47 | 31.6                                | 0.7 | 30.9                                | 1.0 | 2.2%      |
| Bergell  | VS04   | Amph-diorite | Zm3    | VS04 03  | 0.0461                               | 0.0027 | 0.0293                              | 0.0014 | 0.0046                              | 0.0002    | 0.70 | 29.0                                | 1.0 | 29.7                                | 1.0 | -2.4%     |
| Bergell  | VS04   | Amph-diorite | Zm4    | VS04 04  | 0.0470                               | 0.0011 | 0.0312                              | 0.0007 | 0.0048                              | 0.0002    | 1.37 | 31.2                                | 0.7 | 31.0                                | 1.0 | 0.6%      |
| Bergell  | VS04   | Amph-diorite | Zm5    | VS04 05  | 0.0503                               | 0.0015 | 0.0331                              | 0.0009 | 0.0048                              | 0.0002    | 1.13 | 33.0                                | 0.9 | 30.7                                | 1.0 | 7.0%      |
| Bergell  | VS04   | Amph-diorite | Zm6    | VS04 06  | 0.0471                               | 0.0011 | 0.0306                              | 0.0007 | 0.0047                              | 0.0001    | 1.38 | 30.6                                | 0.7 | 30.3                                | 0.9 | 1.0%      |
| Bergell  | VS04   | Amph-diorite | Zm7    | VS04 07  | 0.0521                               | 0.0009 | 0.0364                              | 0.0006 | 0.0051                              | 0.0002    | 1.74 | 36.3                                | 0.6 | 32.5                                | 1.0 | 10.5%     |
| Bergell  | VS04   | Amph-diorite | Zm8    | VS04 08  | 0.0501                               | 0.0011 | 0.0332                              | 0.0007 | 0.0048                              | 0.0002    | 1.50 | 33.2                                | 0.7 | 30.9                                | 1.0 | 6.9%      |
| Bergell  | VS04   | Amph-diorite | Zm9    | VS04 09  | 0.0463                               | 0.0017 | 0.0306                              | 0.0011 | 0.0048                              | 0.0002    | 0.90 | 31.0                                | 1.0 | 30.8                                | 1.0 | 0.6%      |
| Bergell  | VS04   | Amph-diorite | Zm10   | VS04 10  | 0.0470                               | 0.0015 | 0.0312                              | 0.0010 | 0.0048                              | 0.0002    | 1.01 | 31.2                                | 0.9 | 30.9                                | 1.0 | 1.0%      |
| Bergell  | VS04   | Amph-diorite | Zm11   | VS04 11  | 0.0499                               | 0.0013 | 0.0328                              | 0.0008 | 0.0048                              | 0.0002    | 1.26 | 32.8                                | 0.8 | 30.6                                | 1.0 | 6.7%      |
| Bergell  | VS04   | Amph-diorite | Zm12   | VS04 12  | 0.0493                               | 0.0020 | 0.0311                              | 0.0012 | 0.0046                              | 0.0002    | 0.87 | 31.0                                | 1.0 | 29.4                                | 1.0 | 5.2%      |
| Bergell  | VS04   | Amph-diorite | Zm13   | VS04 13  | 0.0473                               | 0.0009 | 0.0316                              | 0.0006 |                                     |           |      |                                     |     |                                     |     |           |
